# Supplementary material
Source: publisher figshare collection journal article supplement (https://acs.figshare.com/ndownloader/files/3623760)
Supplement: Supplementary file 1 [file 3623760]

# Supporting Information for Charge and Nuclear Dynamics Induced by Deep Inner-Shell Multiphoton Ionization of CH<sub>3</sub>I Molecules by Intense X-ray Free-Electron Laser Pulses

Koji Motomura<sup>1</sup>, Edwin Kukk<sup>1,2</sup>, Hironobu Fukuzawa<sup>1,3</sup>, Shin-ichi Wada<sup>3,4</sup>, Kiyonobu Nagaya<sup>3,5</sup>,  
Satoshi Ohmura<sup>5</sup>, Subhendu Mondal<sup>1</sup>, Tetsuya Tachibana<sup>1</sup>, Yuta Ito<sup>1</sup>, Ryosuke Koga<sup>4</sup>,  
Tsukasa Sakai<sup>5</sup>, Kenji Matsunami<sup>5</sup>, Artem Rudenko<sup>6</sup>, Christophe Nicolas<sup>7</sup>, Xiao-Jing Liu<sup>7</sup>,  
Catalin Miron<sup>7,8</sup>, Yizhu Zhang<sup>9</sup>, Yuhai Jiang<sup>9</sup>, Jianhui Chen<sup>10</sup>, Mailam Anand<sup>11</sup>,  
Dong Eon Kim<sup>11</sup>, Kensuke Tono<sup>12</sup>, Makina Yabashi<sup>3</sup>, Makoto Yao<sup>5</sup>, and Kiyoshi Ueda<sup>1,3</sup>

<sup>1</sup> Institute of Multidisciplinary Research for Advanced Materials, Tohoku University, Sendai 980-8577, Japan

<sup>2</sup> Department of Physics and Astronomy, University of Turku, Turku FI-20014, Finland

<sup>3</sup> RIKEN SPring-8 Center, Sayo, Hyogo 679-5148, Japan

<sup>4</sup> Department of Physical Science, Hiroshima University, Higashi-Hiroshima 739-8526, Japan

<sup>5</sup> Department of Physics, Kyoto University, Kyoto 606-8502, Japan

<sup>6</sup> J. R. Macdonald Laboratory, Department of Physics, Kansas State University, Manhattan, Kansas 66506, USA

<sup>7</sup> Synchrotron SOLEIL, L'Orme des Merisiers, Saint-Aubin, BP 48, FR-91192 Gif-sur-Yvette Cedex, France

<sup>8</sup> Extreme Light Infrastructure - Nuclear Physics (ELI-NP), "Horia Hulubei" National Institute for Physics and  
Nuclear Engineering, 30 Reactorului Street, RO-077125 Măgurele, Jud. Ilfov, Romania

<sup>9</sup> Shanghai Advanced Research Institute, Chinese Academy of Sciences, 201210 Shanghai, China

<sup>10</sup> Shanghai Institute of Applied Physics, Chinese Academy of Sciences, 201800 Shanghai, China

<sup>11</sup> Department of Physics, CASTECH, MPC-AS, POSTECH, Pohang, Korea

<sup>12</sup> Japan Synchrotron Radiation Research Institute (JASRI), Sayo, Hyogo 679-5198, Japan

## Momentum filter

In the experiment, we measured all three components of the ions' momenta ( $p_x$ ,  $p_y$ ,  $p_z$ ) using a multicoincidence ion spectrometer based on a position sensitive detector. Here, we define the  $x$ ,  $y$ , and  $z$  directions as the XFEL propagation direction, the molecular beam direction, and the spectrometer axis direction, respectively. In order to extract only true  $\text{I}^{m+}\text{--C}^{n+}$  coincident ion pairs, *i.e.* resulting from a single CH<sub>3</sub>I molecule, we applied a momentum filter based on the momentum conservation law, as described below.

Figure S1a depicts a two-dimensional momentum-sum map for the  $\text{I}^{5+}\text{--C}^{2+}$  coincidences. The horizontal axis is the sum of  $p_x$  for the two ions, and the vertical axis is the sum of  $p_y$ . The clear observation of an island of high intensity on the map indicates that the two momenta are correlated, whereas the diffuse background arises from the inevitable false coincidences, *i.e.*, associating ions resulting from two different molecules. In order to perform the momentum filtering, we first redraw the momentum sum map with the  $\text{I}$  momenta always aligned with the direction of the  $x$  axis, as shown in Figure S1b.

One can see that the map is elongated in the  $x$  direction and the island exhibits an offset from the zero position, where it would be if the two ions would strictly satisfy the momentum conservation

law. The offset indicates that part of the momentum balancing that of the iodine is carried by the departing hydrogens – and represents the "missing" momentum in the sum. For efficient filtering based on the momentum correlation, the map (and each individual event) needs to be corrected for the missing momentum. The correction coefficient ( $k_{mn}$  in the main text) is obtained from the experiment, adjusting the iodine momentum so that the island in the map becomes centered at zero and the entire map becomes circular. In the case of Figure S1b, the suitable value of the coefficient  $k$  was 0.751, and by multiplying the  $\text{I}^{5+}$  momentum with that value, Figure S1c was obtained. By this procedure we obtained the values of  $k_{mn}$  for all ion pairs.

We extracted true coincidence events by limiting the accepted ion pairs to be within a small radius circle around the origin, in the corrected momentum sum maps. Furthermore, the contribution of false coincidences to the ion-pair counts and various other statistics could be estimated by interpolating the diffuse background under the correlated momentum island. The same procedure was also applied to  $y$ - $z$  and  $z$ - $x$  planes to further increase the accuracy of the result.

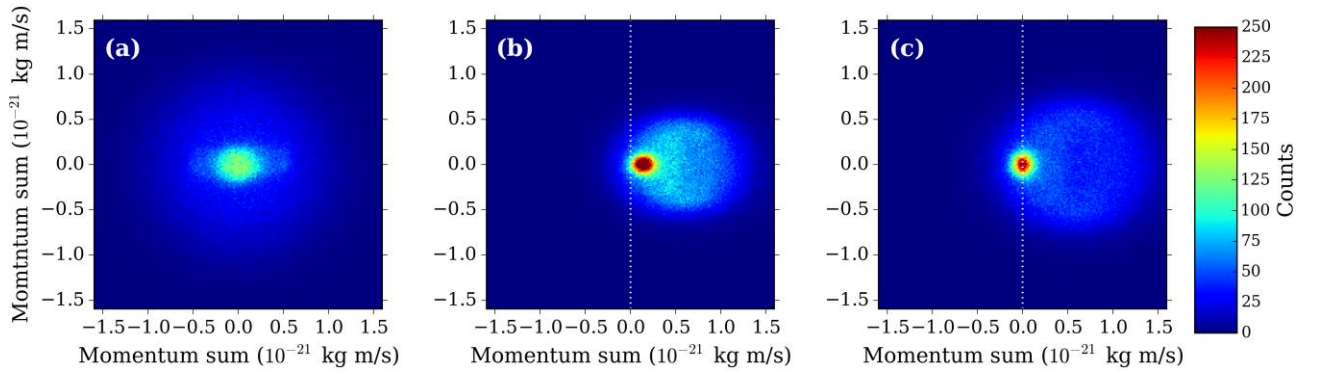

**Figure S1.** The two-dimensional momentum-sum maps for the  $\text{I}^{5+}$ - $\text{C}^{2+}$  coincidences. Vertical dotted lines in (b) and (c) indicate zero position to guide the eye.

Figure S2 depicts the ion time-of-flight spectrum obtained after momentum filtering as described above.

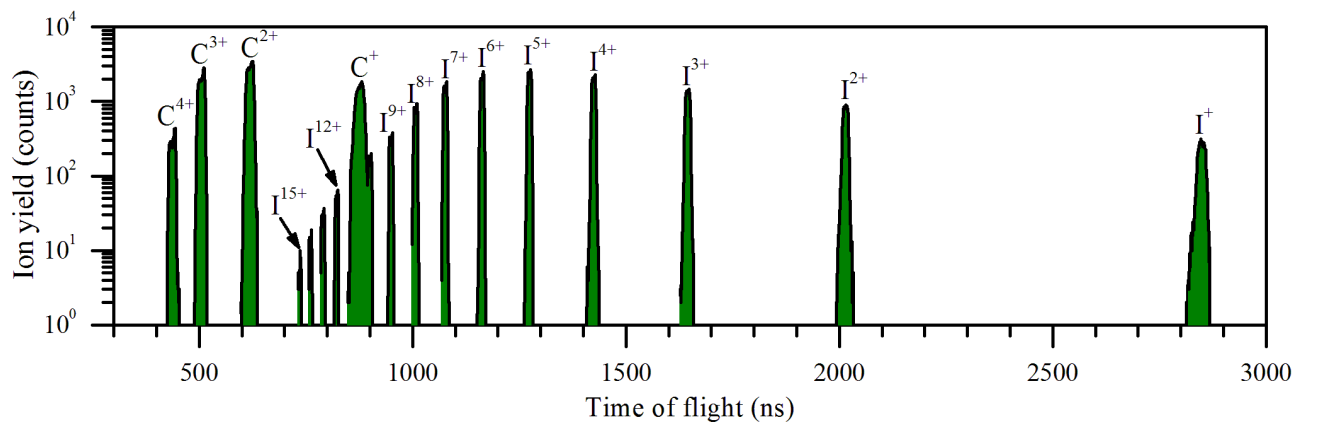

**Figure S2.** The ion time-of-flight spectrum after momentum filtering.
